# Supplementary material for: The Treatment Effect of Liver Transplantation versus Liver Resection for HCC: A Review and Future Perspectives
Source: MDPI journal article supplement (doi:10.3390/cancers13153730), 2021-07-24
Supplement: s1 [file s1]

# The Treatment Effect of Liver Transplantation versus Liver Resection for HCC: A Review and Future Perspectives

Berend R. Beumer, Roeland F. de Wilde, Herold J. Metselaar, Robert A. de Man, Wojciech G. Polak and Jan N.M. IJzermans

## Search systematic reviews: LT vs. LR for early HCC

| Database           | Number of references |
|--------------------|----------------------|
| Embase             | 652                  |
| Web of science     | 245                  |
| Cochrane central   | 287                  |
| Total              | 1184                 |
| Total deduplicated | 1010                 |

### Embase: 652

('liver tumor'/de OR 'liver cancer'/de OR 'liver carcinogenesis'/exp OR 'liver cell carcinoma'/exp OR 'hepatobiliary system tumor'/de OR ((liver OR hepat\* OR intrahepat\*) NEAR/3 (cancer OR carcino\* OR neoplas\* OR tumo\* OR malign\* OR lesion\*) OR hcc):ab,ti) AND ('liver transplantation'/exp OR (((liver OR hepat\*) AND (transplant\* OR graft\*)):kw,de,ab,ti) AND ('liver resection'/exp OR hepatectom\* OR (hepat\* OR liver) AND (resect\* OR 'surgery'/exp OR 'surgery':lnk OR (surg\* OR operative\* OR operation\* OR resect\*):ab,ti))) AND (((('systematic' AND 'review') OR ('meta' AND 'analysis'))):ab,ti OR 'systematic review'/exp)

### Web of science: 245

(TS=(((liver OR hepat\* OR intrahepat\*) NEAR/2 (cancer OR carcino\* OR neoplas\* OR tumo\* OR malign\* OR lesion\*) OR hcc)) AND (((liver OR hepat\* OR organ OR organs) AND (transplant\* OR graft\* OR allotransplant\* OR allograft\* OR autotransplant\* OR autograft\* OR recipient\*)))) AND ((surg\* OR operative\* OR operation\* OR resect\* OR hepatectom\*)))) AND (ALL=((review AND systematic) OR (meta AND analysis)))

### Cochrane CENTRAL: 287 # no restriction on article type

((liver OR hepat\* OR intrahepat\*) NEAR/3 (cancer OR carcino\* OR neoplas\* OR tumo\* OR malign\* OR lesion\*) OR hcc):ab,ti) AND (((liver OR hepat\* OR organ OR organs) AND (transplant\* OR graft\* OR allotransplant\* OR allograft\* OR autotransplant\* OR autograft\* OR recipient\*)):ab,ti) AND ((surg\* OR operative\* OR operation\* OR resect\* OR hepatectom\*):ab,ti)

### Google scholar

"liver|hepatic|intrahepatic cancer|carcinoma|neoplasm|tumor|malignancy|lesion" AND "liver|hepatic transplantation|graft|recipient" AND "resection|hepatectomy|hepatectomies" AND "review|meta"

## Articles after last systematic review ( $\geq 2017$ ) LT vs. LR for early HCC

| Database           | Number of references |
|--------------------|----------------------|
| Embase             | 963                  |
| Web of science     | 814                  |
| Cochrane central   | 235                  |
| Total              | 1248                 |
| Total deduplicated | 1159                 |

### Embase 963

('liver tumor'/mj OR 'liver cancer'/mj OR 'liver carcinogenesis'/mj/exp OR 'liver cell carcinoma'/mj/exp OR ((liver OR hepat\* OR intrahepat\*) NEAR/3 (cancer OR carcino\* OR neoplas\* OR tumo\* OR malign\* OR lesion\*) OR hcc):ti) AND ('liver transplantation'/mj/exp OR (((liver OR hepat\*) AND (transplant\* OR graft\*)):ti) AND ('liver resection'/mj/exp OR hepatectom\* OR (hepat\* OR liver) AND (resect\* OR 'surgery'/mj/exp OR 'surgery':lnk OR (surg\* OR operative\* OR operation\* OR resect\*):ti))) AND (2017:py OR 2018:py OR 2019:py OR 2020:py OR 2021:py) NOT (((('systematic' AND 'review') OR ('meta' AND 'analysis'))):ab,ti OR 'systematic review'/exp OR 'case series'/exp OR 'case series' OR (case AND series)) AND ('randomized controlled trial'/exp OR 'cohort analysis'/exp OR 'longitudinal study'/de OR 'prospective study'/de OR 'retrospective study'/de OR ((random\* NEAR/3 trial\*) OR cohort\* OR longitudinal\* OR prospective\* OR retrospective\*):ab,ti)

### Web of science: 814

((AB=(((liver OR hepat\* OR intrahepat\*) NEAR/2 (cancer OR carcino\* OR neoplas\* OR tumo\* OR malign\* OR lesion\*) OR hcc)) AND (((liver OR hepat\* OR organ OR organs) AND (transplant\* OR graft\* OR allotransplant\* OR allograft\* OR autotransplant\* OR autograft\* OR recipient\*)))) AND ((surg\* OR operative\* OR operation\* OR resect\* OR hepatectom\*)))) AND (PY=("2017" OR "2018" OR "2019" OR "2020" OR "2021") AND DT=("ARTICLE") AND LA=("ENGLISH"))

### Cochrane CENTRAL: 235

((liver OR hepat\* OR intrahepat\*) NEAR/3 (cancer OR carcino\* OR neoplas\* OR tumo\* OR malign\* OR lesion\*) OR hcc):ab,ti) AND (((liver OR hepat\* OR organ OR organs) AND (transplant\* OR graft\* OR allotransplant\* OR allograft\* OR autotransplant\* OR autograft\* OR recipient\*)):ab,ti) AND ((surg\* OR operative\* OR operation\* OR resect\* OR hepatectom\*):ab,ti)

With publication date limited to: 1-01-2017 to 01-07-2021
